# Supplementary material for: Enhanced selective oxidation of h-BN nanosheet through a substrate-mediated localized charge effect
Source: Royal Society of Chemistry journal article supplement (doi:10.1039/c6cp07402b), 2017-01-01
Supplement: c6cp07402b1.pdf [file c6cp07402b1.pdf]

## Supporting Information

### **Enhanced Selective Oxidation of h-BN Nanosheet through Substrate Mediated Localized Charge Effect**

*Keke Mao,<sup>1,2</sup> Xiaojun Wu,<sup>1,\*</sup> and Jinlong Yang<sup>1</sup>*

<sup>1</sup> CAS Key Laboratory of Materials for Energy Conversion, School of Chemistry and  
Materials Sciences, and CAS Center for Excellences in Nanosciences  
Hefei National Laboratory of Physical Sciences at the Microscale  
Synergetic Innovation of Quantum Information & Quantum Technology, University of  
Science and Technology of China, Hefei, Anhui 230026, China.

<sup>2</sup> School of Energy and Environment Science, Anhui University of Technology,  
Maanshan, Anhui 243032, China

\*Corresponding author. E-mail: [xjwu@ustc.edu.cn](mailto:xjwu@ustc.edu.cn);

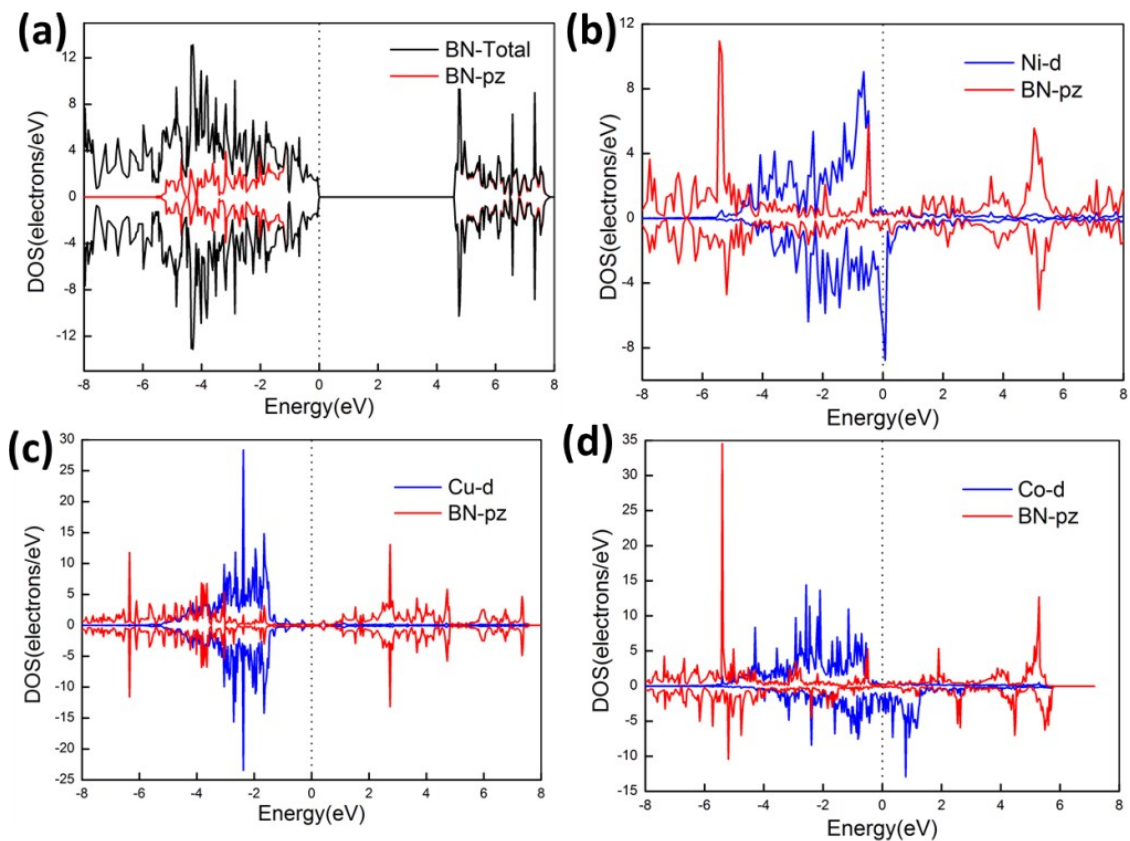

**Figure S1** The density of states (DOS) of (a) pure  $h$ -BN monolayer, (b)  $h$ -BN/Ni(111), (c)  $h$ -BN/Cu(111), and (d)  $h$ -BN/Co(001) projected on  $p_z$  orbitals of B and N, and  $d$  orbitals of metals are plotted. The Fermi energy level is set as zero.

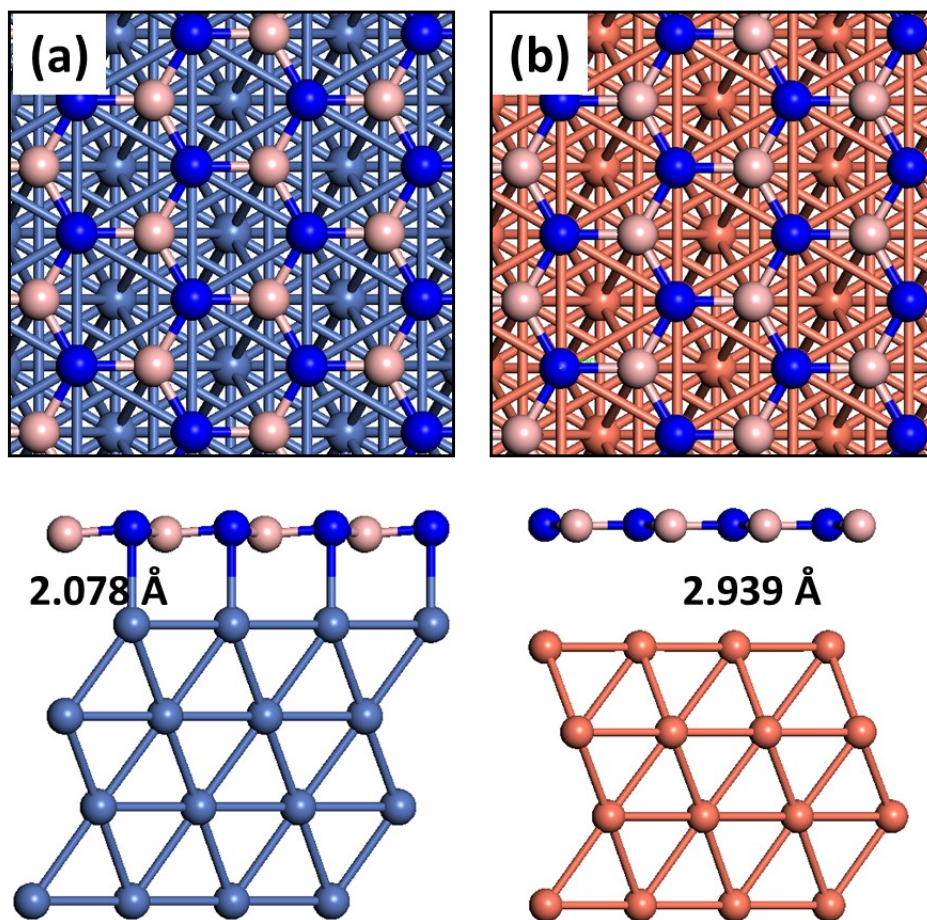

**Figure S2** Top and side views of the optimized structures of (a) *h*-BN/Ni(111) and (b) *h*-BN/Cu(111) with boron atoms occupying the hcp site of substrate.

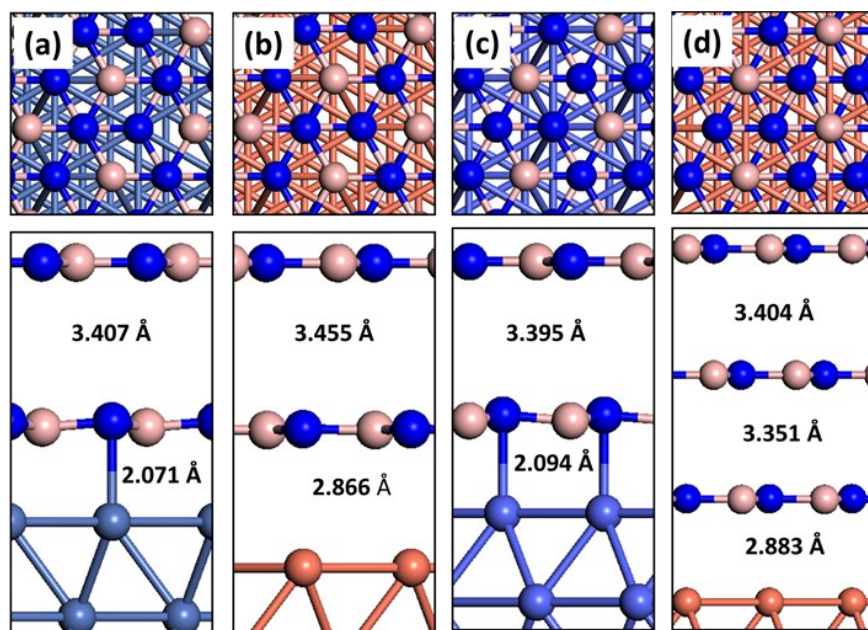

**Figure S3** The top and side views of the optimized structures of *h*-BN bilayer on (a) Ni(111), (b) Cu(111), (c)Co(001) substrates, and *h*-BN triple layer on (d) Cu(111) substrate.

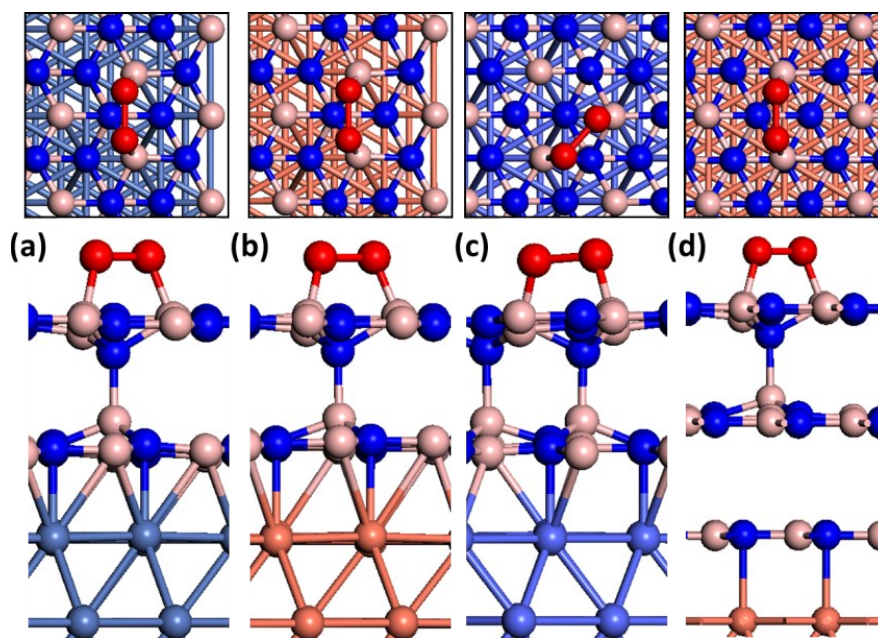

**Figure S4.** Top and side views of O<sub>2</sub> adsorbed structure on *h*-BN bilayer supported by (a) Ni(111), (b) Cu(111), (c) Co(001), and *h*-BN triple layer supported by (d) Cu(111) substrate.

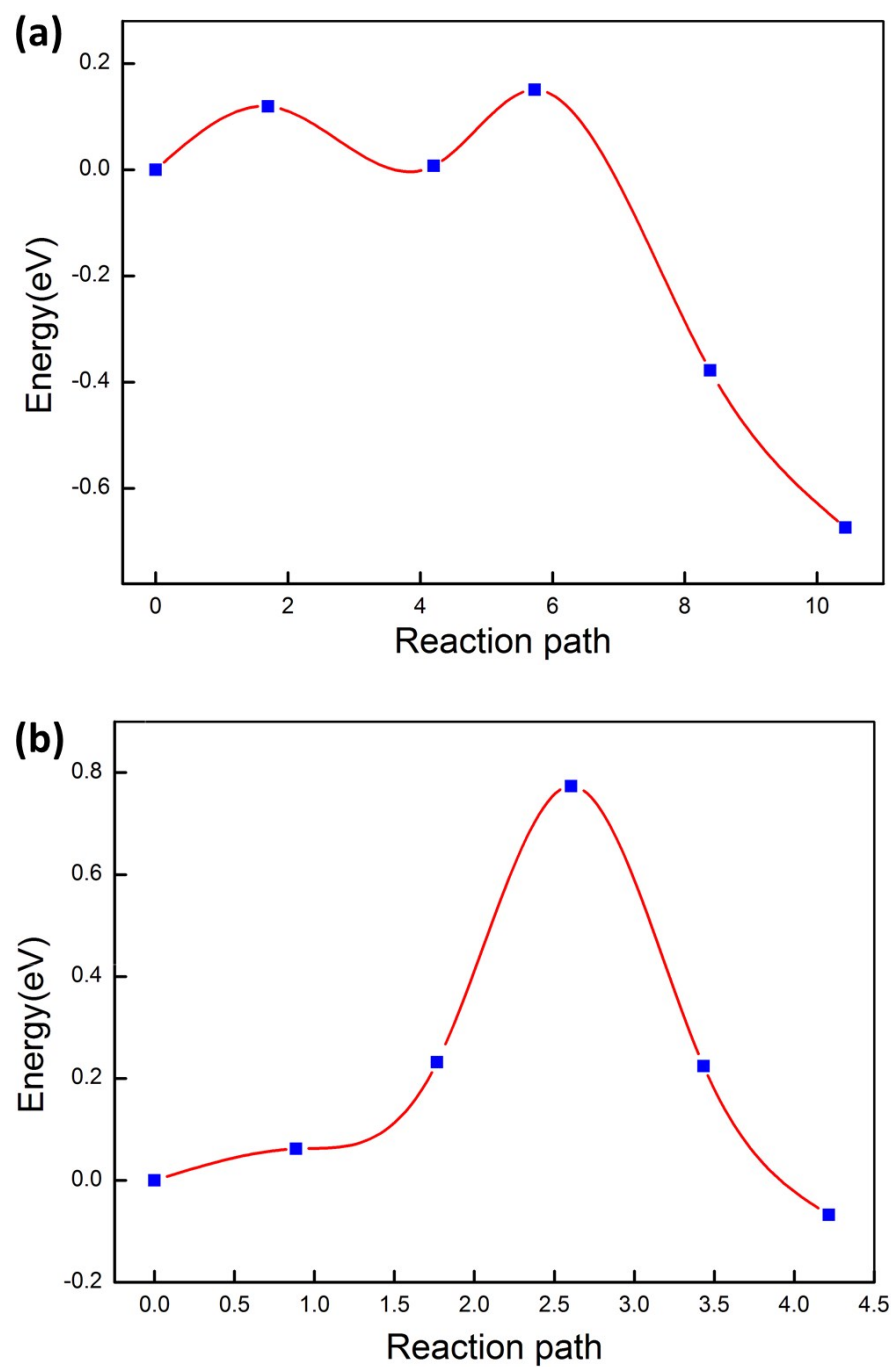

**Figure S5.** The calculated MEP for O<sub>2</sub> chemisorbed on *h*-BN bilayer supported by (a) Cu(111) and (b) Ni(111) substrates, respectively.



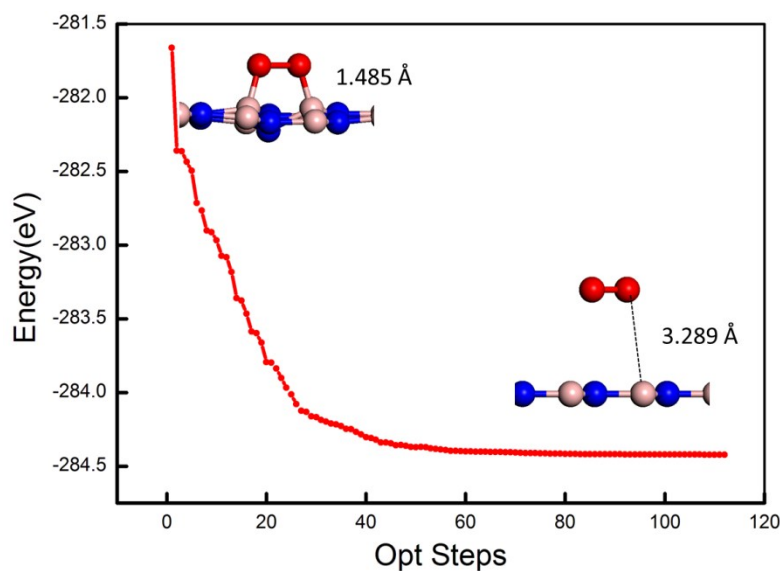

**Figure S6.** The total energy versus optimization steps for O<sub>2</sub> molecule on freestanding *h*-BN monolayer with 2.5% biaxial strain. The initial structure is taken from the O<sub>2</sub> adsorbed structure on *h*-BN/Cu(111) species

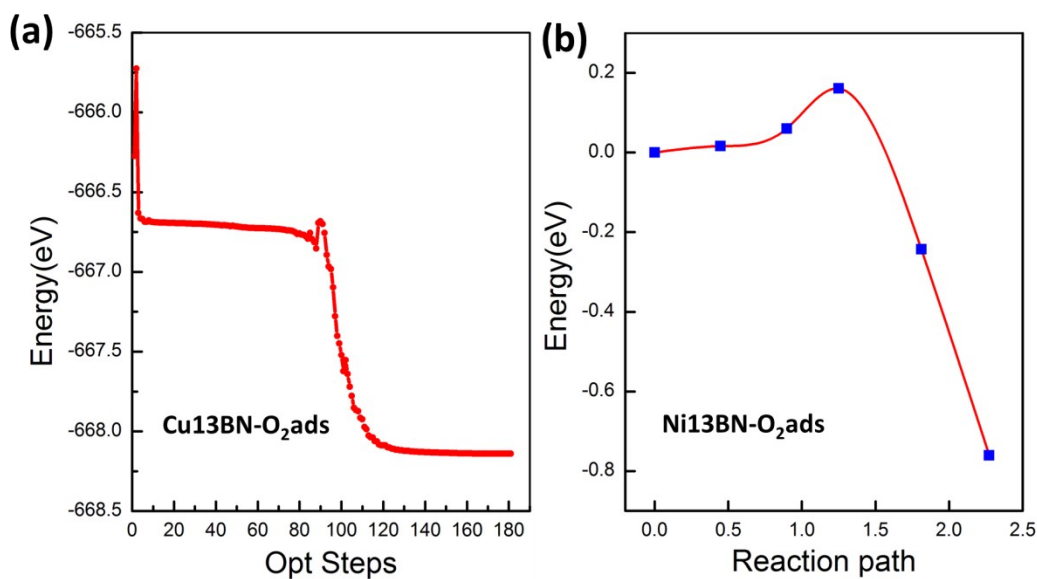

**Figure S7.** (a) The energy profile versus optimization step for O<sub>2</sub> adsorption on *h*-BN/Cu<sub>13</sub>, indicating that the adsorption process is spontaneous. (b) The calculated MEP for the O<sub>2</sub> adsorption on *h*-BN/Ni<sub>13</sub>.

**TABLE S1** The adsorption energy ( $E_{ads}$ ), local magnetic moment on O atom ( $M$ ), the O-O bond lengths ( $d_{O-O}$ ), and charge transfer from  $h$ -BN sheet to  $O_2$  specie ( $C$ ) are summarized for  $bi$ - $h$ -BN/Cu(111),  $bi$ - $h$ -BN/Ni(111),  $bi$ - $h$ -BN/Co(001), and  $tri$ - $h$ -BN/Cu(111).

|                 | $O_2/bi$ - $h$ -<br>BN/Ni(111) | $O_2/bi$ - $h$ -<br>BN/Cu(111) | $O_2/bi$ - $h$ -<br>BN/Co(001) | $O_2/tri$ - $h$ -<br>BN/Cu(111) |
|-----------------|--------------------------------|--------------------------------|--------------------------------|---------------------------------|
| $E_{ads}$ (eV)  | -0.165                         | -0.757                         | 0.112                          | 0.881                           |
| $M$ ( $\mu_B$ ) | 0.202                          | -0.079                         | -0.047                         | 0.285                           |
| $d_{O-O}$ (Å)   | 1.401                          | 1.458                          | 1.449                          | 1.388                           |
| $C$ (e)         | 1.186                          | 1.473                          | 1.449                          | 1.057                           |

**TABLE S2** The adsorbed  $O_2$  properties on electron doped  $h$ -BN monolayer. The adsorption energy ( $E_{ads}$ ) and O-O bond length ( $L(O-O)$ ) are listed in the below table. “number  $e$ ” indicates the number of electrons per supercell are introduced to  $h$ -BN monolayer.

|                | 1 $e$  | 2 $e$  | 3 $e$  |
|----------------|--------|--------|--------|
| $E_{ads}$ (eV) | -0.972 | -1.702 | -2.568 |
| $L_{O-O}$ (Å)  | 1.343  | 1.485  | 1.511  |

**Table S3.** The adsorption energy ( $E_{ads}$  in unit of eV) and O-O bond lengths ( $d_{O-O}$  in unit of Å) for  $O_2$  molecule adsorbed on  $Ni_{13}$  and  $Cu_{13}$  supported  $h$ -BN monolayer.

|           | Cu <sub>13</sub> |        |        |        | Ni <sub>13</sub> |        |        |       |
|-----------|------------------|--------|--------|--------|------------------|--------|--------|-------|
|           | C1               | E1     | E2     | F1     | C1               | E1     | E2     | F1    |
| $E_{ads}$ | -2.028           | -1.514 | -1.961 | -0.408 | -0.886           | -0.418 | -0.108 | 01.36 |
| $d_{O-O}$ | 1.441            | 1.414  | 1.441  | 1.266  | 1.427            | 1.404  | 1.327  | 1.242 |
